# Supplementary material
Source: PubMed Central journal article supplement (PMC3698996)
Supplement: supp_jit042_jit042supp.pdf [file supp_jit042_jit042supp.pdf]

## SUPPLEMENTARY INFORMATION

## HTS Thallium Flux Assay for hERG Activity

High-Throughput Screening Facility - *Vanderbilt University*  
(<http://www.vanderbilt.edu/hts/index.htm>)

|                 |                |
|-----------------|----------------|
| TEST COMPOUND   | VNI (5mM/DMSO) |
| Tested dose VNI | 15uM – 0.2nM   |
| Control         | Dofetilide     |
| IC50 Control    | 1.5E-8         |
| R <sup>2</sup>  | 0.98           |

### hERG Activity measured as Thallium Flux on FDSS6000

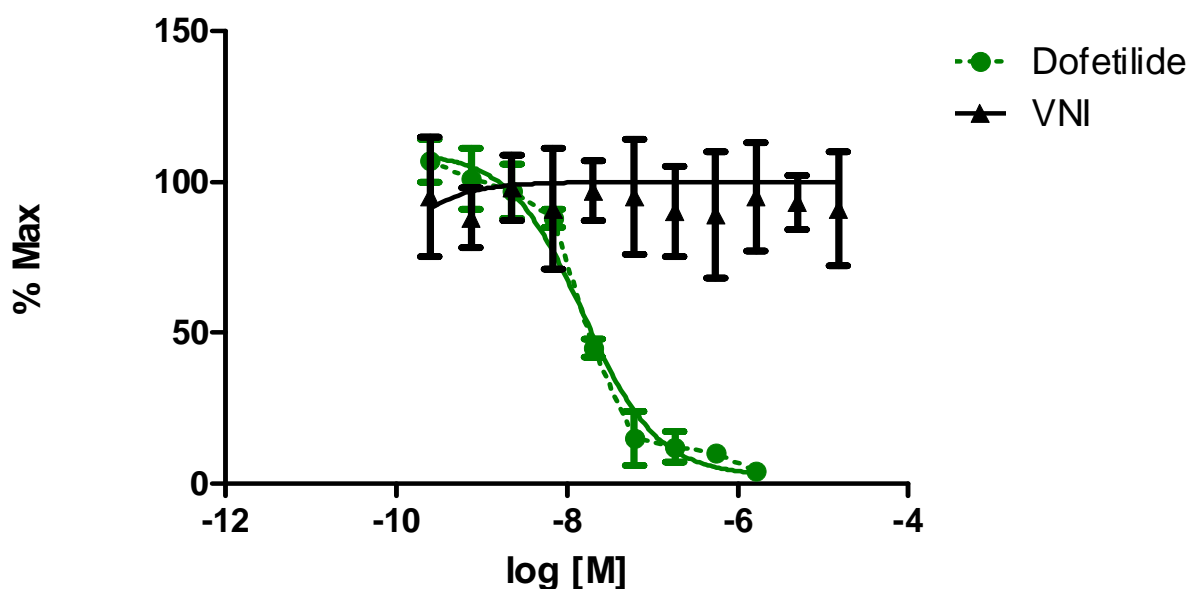

**Figure S1. VNI does not influence hERG channel activity.** The compound was tested in triplicate in dose-response and compared to the standard, dofetilide.
